# Supplementary material
Source: publisher figshare collection journal article supplement (https://sage.figshare.com/ndownloader/files/15312446)

Figure 2. The “Burglar in the night “

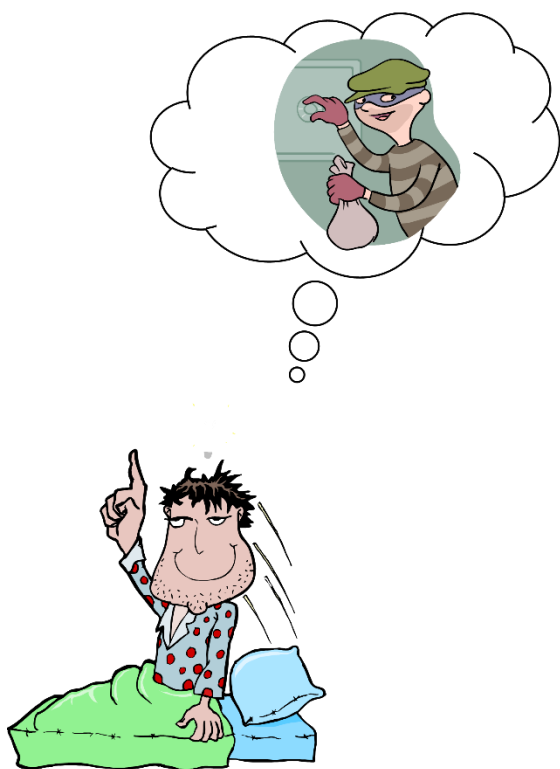

Supplement: Supplementary file 1 [file 15312446]
